# Supplementary material for: Health websites on COVID-19: are they readable and credible enough to help public self-care?
Source: PubMed Central journal article supplement (PMC7772974; doi:10.5195/jmla.2021.1020), 2021-01-01

## Health websites on COVID-19: are they readable and credible enough to help public self-care?

Saeideh Valizadeh-Haghi, PhD; Yasser Khazaal, MD; Shahabedin Rahmatizadeh, PhD

### APPENDIX

#### Interest in coronavirus-related searches over time, based on Google trends

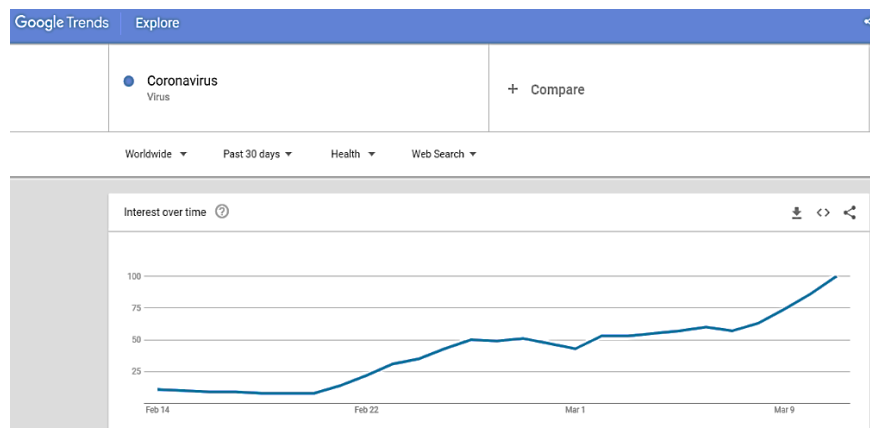

Supplement: jmla-109-1-75-s01.pdf [file jmla-109-1-75-s01.pdf]
